# Supplementary material for: Chemical vapor deposition of bilayer graphene with layer-resolved growth through dynamic pressure control
Source: Royal Society of Chemistry journal article supplement (doi:10.1039/c6tc02339h), 2016-01-01
Supplement: c6tc02339h1.pdf [file c6tc02339h1.pdf]

## Supporting Information

### **Chemical vapor deposition of bilayer graphene with layer-resolved growth through dynamic pressure control**

*Birong Luo<sup>a</sup>, Bingyan Chen<sup>b</sup>, Anle Wang<sup>c</sup>, Dechao Geng<sup>a</sup>, Jie Xu<sup>a</sup>, Huaping Wang<sup>a</sup>,*

*Zhiyong Zhang<sup>b</sup>, Lianmao Peng<sup>b</sup>, Zhiping Xu<sup>\*c</sup> and Gui Yu<sup>\*ad</sup>*

<sup>a</sup> Beijing National Laboratory for Molecular Sciences, Institute of Chemistry, Chinese

Academy of Sciences, Beijing 100190, P. R. China

<sup>b</sup> Key Laboratory for the Physics and Chemistry of Nanodevices and Department of

Electronics, Peking University, Beijing 100871, P. R. China

<sup>c</sup> Applied Mechanics Laboratory, Department of Engineering Mechanics and Center

for Nano and Micro Mechanics, Tsinghua University, Beijing 100084, P. R. China

<sup>d</sup> University of Chinese Academy of Sciences, Beijing 100049, China

<sup>\*</sup>Corresponding Author

E-mail: yugui@iccas.ac.cn; xuzp@tsinghua.edu.cn

## **Contents**

- S1.** Experiment conditions of VPCVD growth
- S2.** Supplementary SEM, optical, and Raman microscope characterizations
- S3.** AFM characterization of bilayer graphene patches
- S4.** TEM characterizations of the bilayer graphene with disoriented order
- S5.** Method for the theoretical calculation
- S6.** Supplementary electronic properties of the dual-gate devices

### S1. Experiment conditions of VPCVD growth

**Table S1.** The experiment parameters of as-grown graphene by VPCVD method.

| Experiment number<br>(#) | The flow rate<br>ratio of CH <sub>4</sub> to H <sub>2</sub> ( ) | Growth time<br>(min) | Variation<br>rate of<br>pressure<br>(KPa/min) | Growth<br>temperature<br>(°C) |
|--------------------------|-----------------------------------------------------------------|----------------------|-----------------------------------------------|-------------------------------|
| 1                        | 1:200                                                           | 5.5                  | 18.36                                         | 1020                          |
| 2                        | 1:150                                                           | 7.5                  | 13.47                                         |                               |
| 3                        | 1:100                                                           | 10                   | 10.1                                          |                               |
| 4                        | 1:75                                                            | 15                   | 6.73                                          |                               |
| 5                        | 1:50                                                            | 21                   | 4.81                                          |                               |
| 6                        | 1:40                                                            | 27                   | 3.74                                          |                               |
| 7                        | 1:30                                                            | 37                   | 2.73                                          |                               |
| 8                        | 1:20                                                            | 45                   | 2.24                                          |                               |

## S2. Supplementary SEM, optical, and Raman microscope characterizations

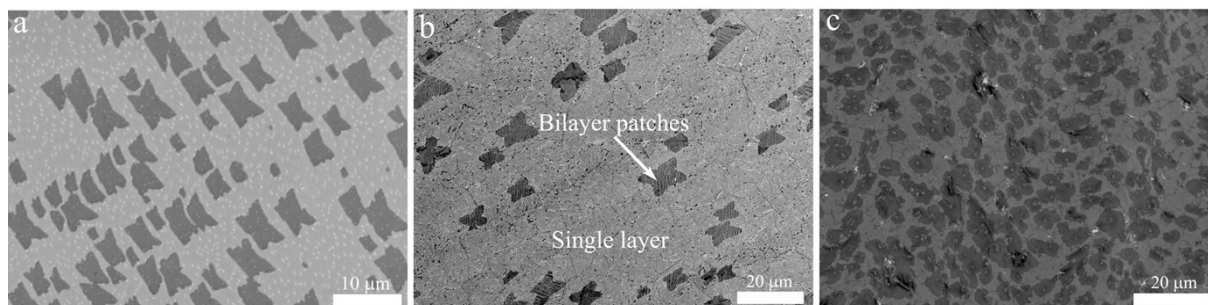

**Fig. S1** SEM images of as-grown graphene on copper foils by VPCVD with 1 sccm  $\text{CH}_4$  and different  $\text{H}_2$  flow rates [a) 150, b) 75, and c) 30 sccm, also see Table S1].

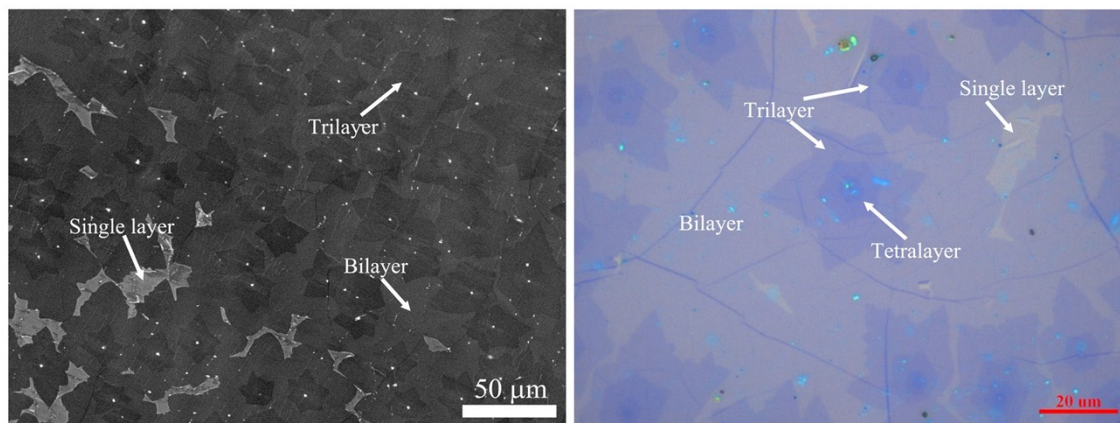

**Fig. S2** SEM and optical images of as-grown graphene by VPCVD with 1:10 flow rate ratio of  $\text{CH}_4/\text{H}_2$ , showing the formation of tri- even tetra-layer graphene.

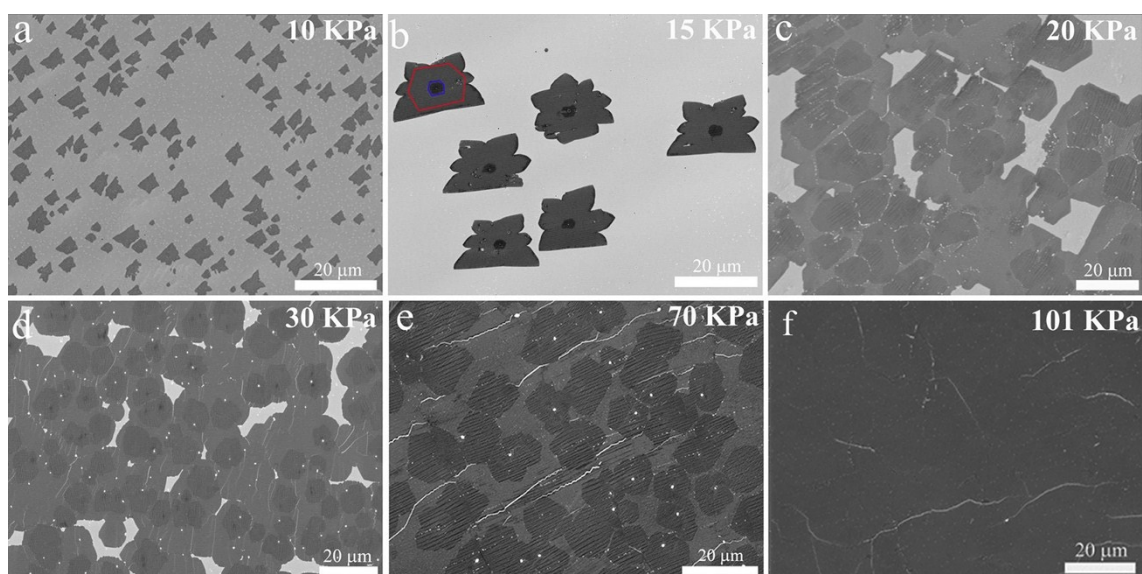

**Fig. S3** SEM images of as-grown graphene at different intermediate states of end pressure (10, 15, 20, 30, 70, 101 KPa) in the VPCVD using 1:20 flow rate ratio of  $\text{CH}_4/\text{H}_2$  gas flow.

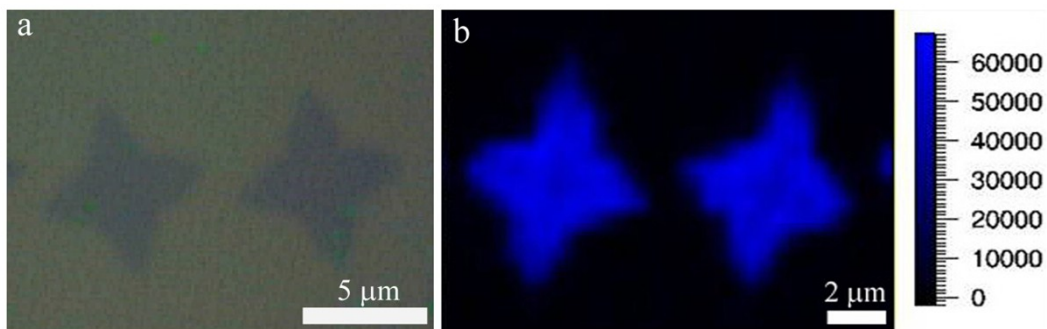

**Fig. S4** a) Optical image of single-layer graphene grains. b) The corresponding intensity mapping of G Raman band for the single-layer graphene grains.

### S3. AFM characterization of bilayer graphene patches

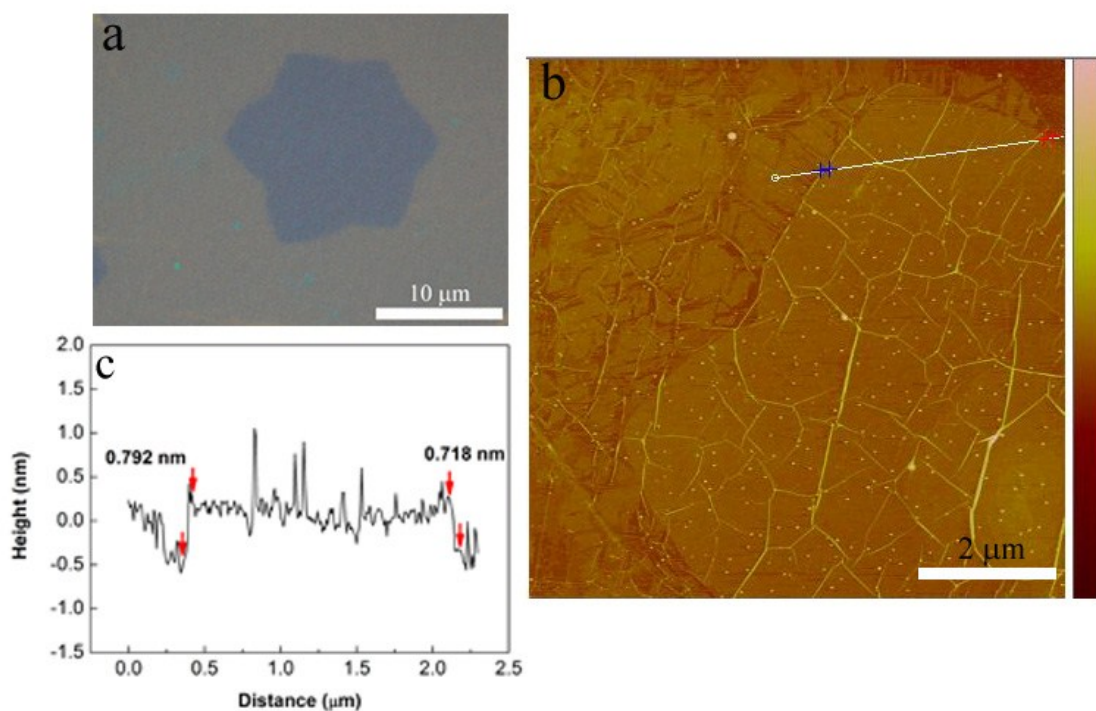

**Fig. S5** a) Optical image of a bilayer graphene patch transferred onto  $\text{SiO}_2/\text{Si}$  substrate. b) The AFM height image of lobes of bilayer graphene patch transferred onto  $\text{SiO}_2/\text{Si}$  substrate. c) The corresponding step height profile between the second layer and the first layer graphene along the line in (b).

#### S4. TEM characterizations of the bilayer graphene with disoriented order

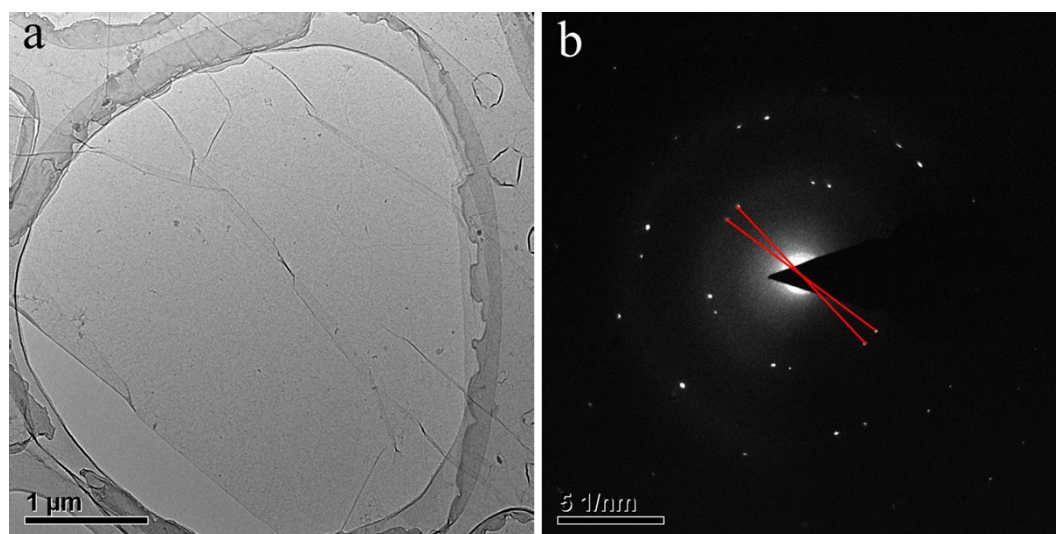

**Fig. S6** a) TEM image of bilayer graphene with disoriented stacking order produced during the sample fabrications. b) Its corresponding diffraction patterns.

## S5. Method for the theoretical calculation

We perform molecular dynamics (MD) simulations using the large-scale atomic/molecular massively parallel simulator (LAMMPS) package<sup>[1]</sup>. The adaptive intermolecular reactive empirical bond-order (AIREBO) potential function is employed to calculate interaction between carbon atoms in graphene<sup>[2]</sup>. Copper substrates are modeled using the embedded atom method (EAM), where the graphene and Cu (111) surface are aligned in the *top-fcc* configuration<sup>[3]</sup>. In addition to the van der Waals interactions between graphene layers, a pairwise interaction in the Lennard-Jones form  $V(r) = 4\epsilon[(\sigma/r)^{12} - (\sigma/r)^6]$  is introduced for the carbon-copper interactions, where the parameters  $\epsilon = 0.02578$  eV and  $\sigma = 0.30825$  are obtained by mixing the parameters for carbon (in graphite form) and copper (in face-centered crystal) using the Lorentz-Berthelot rule<sup>[3]</sup>. The stacked graphene-metal hybrids with different mis-orientated angles are constructed and relaxed afterwards using the conjugated-gradient (CG) algorithm to obtain the total energies.

## References

1. S. Plimpton, *J. Comp. Phys.* 1995, **117** (1), 1-19.
2. D. W. Brenner, O. A. Shenderova, J. A. Harrison, S. J. Stuart, B. Ni and S. B. Sinnott, *J. Phys.: Condens. Matter.*, 2002, **14** (4), 783-802.
3. Z. Xu and M. J. Buehler, *ACS Nano*, 2009, **3** (9), 2767-2775.

## S6. Supplementary electronic properties of the dual-gate devices

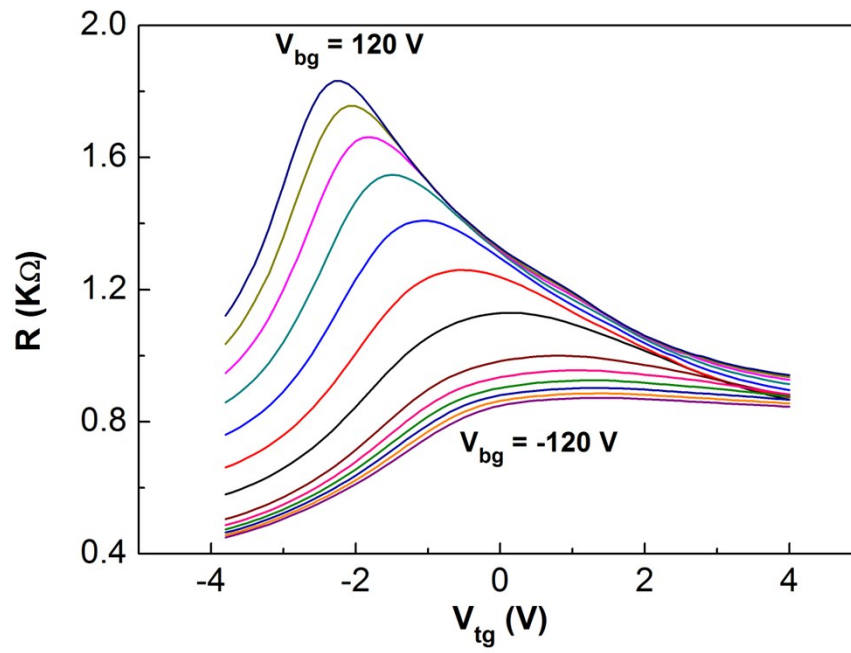

**Fig. S7**  $R$  vs. top-gate voltage ( $V_{tg}$ ) at different back-gate voltage ( $V_{bg}$ ) ranging from 120 V to -120 V with 20 V steps for the dual-gate device measured in the air atmosphere.
